# Supplementary material for: Update on Calcitonin Screening for Medullary Thyroid Carcinoma and the Results of a Retrospective Analysis of 12,984 Patients with Thyroid Nodules
Source: MDPI journal article supplement (doi:10.3390/cancers15082333), 2023-04-17
Supplement: s1 [file s1]

**Suppl. Table S2.** Overview of large international studies on routine Ctn measurement in nodular thyroid disease (only studies with at least 1000 patients).

Abbreviations: AFTN=autonomous functioning thyroid nodule; AIT=autoimmune thyroiditis; f=females; GD=Grave's disease; ICMA=immunochemiluminometric assay;

IRMA=immunoradiometric assay; m=males; PPI=proton pump inhibitors. \*1 additional patient had been diagnosed with MEN but refused thyroidectomy (Ctn 81.9 pg/ml); \*\*including 2 histologically discovered MTC cases without elevated basal Ctn values.

| first author<br>publication<br>year    | country<br>(region)           | recruitment<br>period | follow-<br>up<br>period | patients<br>total | m:f    | age<br>[yrs.]   | inclusion<br>criteria                                                                                                           | exclusion criteria                                                                                                        | Assay                                                                                  | Basal<br>Ctn<br>cutoff<br>[pg/ml] | Basal Ctn<br>patients<br>>cutoff<br>n (%)        | patients with<br>elevated Ctn<br>lost to follow-<br>up or with<br>incomplete<br>data | MTC<br>prevalence    | proportion<br>of sporadic<br>MTC |
|----------------------------------------|-------------------------------|-----------------------|-------------------------|-------------------|--------|-----------------|---------------------------------------------------------------------------------------------------------------------------------|---------------------------------------------------------------------------------------------------------------------------|----------------------------------------------------------------------------------------|-----------------------------------|--------------------------------------------------|--------------------------------------------------------------------------------------|----------------------|----------------------------------|
| Hahm<br>2001<br>[34]                   | Korea<br>(Seoul)              | 6/1998-<br>1999       | not<br>described        | 1,448             | 1:4.08 | 14-86           | nodular thyroid<br>disease                                                                                                      | not specified                                                                                                             | IRMA<br>(Medgenix CT-<br>U.S., BioSource)                                              | 10 (m/f)                          | 56 (3.9 %)                                       | not described                                                                        | 10/1,448<br>(0.69%)  | 80 %                             |
| Hatzl-<br>Griesenhofer<br>2002<br>[61] | Austria<br>(Linz)             | 1/1999-<br>12/2001    | not<br>described        | 3,899             | 1:3.72 | 6-90            | nodular thyroid<br>disease                                                                                                      | not specified                                                                                                             | ICMA<br>(Nichols Institute<br>Diagnostic)                                              | 4.6 (f)<br>11.5<br>(m)            | 230 (5.9%)<br>f:140<br>(4.6%)<br>m:90<br>(10.9%) | 23                                                                                   | 12/3,899<br>(0.31%)  | 75 %                             |
| Elisei<br>2004<br>[4]                  | Italy<br>(Sienna)             | 1991-<br>1998         | 3 - 6 yrs.              | 10,864            | 1:4.00 | 12-82           | nodular thyroid<br>disease                                                                                                      | not specified                                                                                                             | IRMA<br>(ELSA hCT,<br>CIS-<br>Biointernational)                                        | 20 (m/f)                          | 47 (0.4%)                                        | 1                                                                                    | 40/10,864<br>(0.37%) | 80 %                             |
| Vierhapper<br>2005<br>[35]             | Austria<br>(Vienna)           | 8/1994-<br>8/2004     | not<br>described        | 10,157            | 1:3.97 | not<br>reported | nodular thyroid<br>disease                                                                                                      | known Ctn elevation<br>or C-cell neoplasia                                                                                | 1994-1999 IRMA<br>(CIS-Biolnt)<br>1994-2004 ICMA<br>(Nichols Institute<br>Diagnostics) | 10 (m/f)                          | 507 (5.0%)                                       | 18                                                                                   | 32/10,158<br>(0.32%) | 91 %                             |
| Papi<br>2006<br>[62]                   | Italy<br>(Rome/<br>Modena)    | 4/2003-<br>3/2004     | not<br>described        | 1425              | 1:4.07 | 18-91           | nodular thyroid<br>disease (non-<br>palpable<br>nodules <10<br>mm only in<br>case of<br>suspicious<br>ultrasonogr.<br>features) | known Ctn elevation<br>or C-cell neoplasia,<br>family history of<br>MEN, patients in<br>follow-up for thyroid<br>diseases | ICMA<br>(Nichols Institute<br>Diagnostics)                                             | 5 (m/f)                           | 23 (1.6%)                                        | not described                                                                        | 9/1,425<br>(0.63%)   | 100 %                            |
| Costante<br>2007<br>[36]               | Italy<br>(various<br>regions) | 1/2001-<br>12/2004    | 2 - 4<br>years          | 5,817             | 1:4.24 | 11-72           | nodular thyroid<br>disease                                                                                                      | known MTC or<br>family history of<br>MTC, renal failure                                                                   | ICMA<br>(Nichols<br>Advantage,<br>Nichols Institute<br>Diagnostics)                    | 10 (m/f)                          | 282 (4.8%)                                       | 45                                                                                   | 15/5,817<br>(0.26%)  | not<br>reported                  |
| Rink<br>2009<br>[27]                   | Germany<br>(Rhine-<br>Main)   | 7/2000-<br>10/2006    | up to<br>87<br>months   | 21,928            | 1:3.32 | 8-97            | nodular thyroid<br>disease                                                                                                      | not specified                                                                                                             | IRMA<br>(1. Calcitonin-<br>IRMA,<br>IBL;<br>2. Calcitonin-<br>IRMA magnum,<br>Medipan) | 10 (m/f)                          | 885 (4.0%)                                       | 509                                                                                  | 28/21,928<br>(0.13%) | 80 %                             |

|                                              |                                |                               |                                  |                           |                 |                       |                                                                      |                                                                                                                                   |                                                 |                                             |                                                        |                                                                                                  |                           |                                           |
|----------------------------------------------|--------------------------------|-------------------------------|----------------------------------|---------------------------|-----------------|-----------------------|----------------------------------------------------------------------|-----------------------------------------------------------------------------------------------------------------------------------|-------------------------------------------------|---------------------------------------------|--------------------------------------------------------|--------------------------------------------------------------------------------------------------|---------------------------|-------------------------------------------|
| Herrmann<br>2010<br>[28]                     | Germany<br>(Bochum)            | 6/2005-<br>9/2009             | not<br>described                 | 1,007                     | 1:1.29          | 55±14                 | nodular thyroid<br>disease                                           | known Ctn ele-<br>vation, impaired<br>renal function, GD,<br>AIT, pseudo-<br>hypoparathyroidism,<br>alcohol or drug<br>abuse, PPI | ICMA<br>(Immulite 2000,<br>Siemens)             | 10 (m/f)                                    | 17 (1.7%)                                              | none                                                                                             | 2/1,007<br>(0.2%)         | 100 %                                     |
| <b>first author<br/>publication<br/>year</b> | <b>country<br/>(region)</b>    | <b>recruitment<br/>period</b> | <b>follow-<br/>up<br/>period</b> | <b>patients<br/>total</b> | <b>m:f</b>      | <b>age<br/>[yrs.]</b> | <b>inclusion<br/>criteria</b>                                        | <b>exclusion criteria</b>                                                                                                         | <b>Assay</b>                                    | <b>Basal<br/>Ctn<br/>cutoff<br/>[pg/ml]</b> | <b>Basal Ctn<br/>patients<br/>&gt;cutoff<br/>n (%)</b> | <b>patients with<br/>elevated Ctn<br/>lost to follow-<br/>up or with<br/>incomplete<br/>data</b> | <b>MTC<br/>prevalence</b> | <b>proportion<br/>of sporadic<br/>MTC</b> |
| Grani<br>2012<br>[37]                        | Italy<br>(Rome)                | 5/2005-<br>2/2010             | up to<br>36<br>months            | 1,073                     | 1:4.96          | 56±13                 | patientes<br>referred to<br>FNAC because<br>of suspicious<br>nodules | not specified                                                                                                                     | ICMA<br>(automated two-<br>site<br>immunoassay) | 10 (m/f)                                    | 41 (3.8%)                                              | 2                                                                                                | 2*/1,073<br>(0.19%)       | not reported                              |
| Schneider<br>2012<br>[29]                    | Germany<br>(Cologne)           | 1/2004-<br>12/2010            | up to<br>1 year                  | 11,270                    | not<br>reported | not<br>reported       | nodules ≥2<br>mm                                                     | MTC or family story<br>of MTC, renal<br>insufficiency,<br>bacterial infection,<br>alcohol abuse, PPI<br>therapy, GD or AIT        | ICMA<br>(Immulite 2000,<br>Siemens)             | 13 (m/f)                                    | 32 (0.3%)                                              | 2                                                                                                | 12**/11,270<br>(0.11%)    | not<br>reported                           |
| Giovanella<br>2013<br>[38]                   | Switzerland<br>(Bellinzona)    | 1/2008-<br>12/2010            | 24 – 35<br>months                | 1,236                     | 1:1.20          | 53±17                 | nodular thyroid<br>disease                                           | pulmonary or<br>pancreatic tumours,<br>kidney failure,<br>sepsis, alcohol<br>abuse, smoking,<br>PPI therapy, AFTN,<br>GD or AIT   | ICMA<br>(Immulite 2000,<br>Siemens)             | 10 (m/f)                                    | 14 (1.1%)                                              | none                                                                                             | 2/1,236<br>(0.16%)        | 100 %                                     |
| Silvestre<br>2019<br>[39]                    | Portugal<br>(Lisboa<br>region) | 1/2011-<br>12/2015            | not<br>described                 | 1504                      | not<br>reported | not<br>reported       | nodular thyroid<br>disease                                           | not specified                                                                                                                     | ICMA<br>(Immulite 2000,<br>Siemens)             | 10 (m/f)                                    | 69 (4.6%)                                              | 49                                                                                               | 12/1,504<br>(0.80%)       | 86 %                                      |
| Storani<br>2019<br>[63]                      | Argentina<br>(Buenos<br>Aires) | 1/2009-<br>6/2017             | up to<br>6 yrs.                  | 1,017                     | 1:7.07          | 18-88                 | nodules >2 mm                                                        | known C-cell<br>neoplasia, chronic<br>kidney failure, PPI<br>therapy                                                              | ICMA<br>(Immulite 2000,<br>Siemens)             | 12 (f)<br>18 (m)                            | 4 (0.4%)                                               | none                                                                                             | 2/1,017<br>(0.2%)         | 50 %                                      |
| present<br>study                             | Germany<br>(Rhine-<br>Ruhr)    | 11/2009-<br>11/2014           | up to<br>13 yrs.                 | 12,984                    | 1:3.98          | 18-90                 | nodules >2 mm                                                        | known Ctn elevation<br>or C-cell neoplasia,<br>advanced kidney<br>disease                                                         | IRMA<br>(SELco<br>Calcitonin,<br>Medipan)       | 10 (f)<br>15 (m)                            | 207 (1.6%)                                             | 83                                                                                               | 16/12,984<br>(0.12%)      | 82 %                                      |
