# Supplementary material for: Update on Calcitonin Screening for Medullary Thyroid Carcinoma and the Results of a Retrospective Analysis of 12,984 Patients with Thyroid Nodules
Source: MDPI journal article supplement (doi:10.3390/cancers15082333), 2023-04-17
Supplement: s1 [file s1]

**Suppl. Table S1.** Characteristics of all 16 patients with histologically confirmed MTC that was detected by Ctn screening. \*external laboratory; stimulation test: Ca=calcium glucuronate, Pg=pentagastrin; n.d.= not determined

| ID     | sex (f/m)<br>age at surgery [y] | ultrasonographical appearance<br>of the MTC                                                                           | Ctn (IRMA)<br>at primary<br>screening<br>[pg/ml] | Ctn (ICMA)<br>at primary<br>screening<br>[pg/ml] | CEA<br>[ng/ml] | stimulation test: Ca / Pg<br>(Ctn peak [pg/ml]) | pre-op. Ctn [pg/ml]<br>(time since primary<br>screening) |
|--------|---------------------------------|-----------------------------------------------------------------------------------------------------------------------|--------------------------------------------------|--------------------------------------------------|----------------|-------------------------------------------------|----------------------------------------------------------|
| MTC-01 | f<br>38                         | MTC could not be clearly assigned to a nodule                                                                         | 53.0                                             | 65.2                                             | 1.3            | Ca<br>(>2000)                                   | 45.2<br>(8 months)                                       |
| MTC-02 | f<br>70                         | bilateral hypoechoic nodules<br>with well-defined margins up to 1.2cm, part. microcalcifications                      | 868                                              | 821                                              | 16.6           | Ca<br>(>2000)                                   | 1156<br>(2 months)                                       |
| MTC-03 | f<br>45                         | MTC could not be clearly assigned to a nodule                                                                         | 19.3                                             | 31.6                                             | 3.1            | Ca<br>(612)                                     | 29.9<br>(1.5 months)                                     |
| MTC-04 | m<br>73                         | MTC could not be clearly assigned to a nodule                                                                         | 30.5                                             | 40.0                                             | 6.2            | Ca<br>(1616)                                    | 54.0<br>(1 month)                                        |
| MTC-05 | m<br>72                         | 2.4x1.8x3.6cm isoechoic nodule with well-defined margins,<br>small cystic internal structures, no calcifications      | 1132                                             | 1022                                             | 22.2           | n.d.                                            | 1022<br>(0 months)                                       |
| MTC-06 | m<br>44                         | MTC could not be clearly assigned to a nodule                                                                         | 90.4                                             | 83.3                                             | 0.7            | Ca<br>(1363)                                    | 120<br>(1,5 months)                                      |
| MTC-07 | f<br>39                         | 1.1x1.5x2.8cm hypoechoic nodule with well-defined margins                                                             | 838                                              | 632                                              | 36.7           | n.d.                                            | 632<br>(0 months)                                        |
| MTC-08 | f<br>67                         | 0.7x1.0x1.0cm hypoechoic nodule with well-defined margins                                                             | 280                                              | 268                                              | 5.4            | Pg<br>(5347)                                    | 268<br>(1 month)                                         |
| MTC-09 | f<br>29                         | 0.7x0.5x0.9cm hypoechoic nodule with well-defined margins,<br>without calcifications                                  | 14.6                                             | n.d.                                             | 4.2            | Ca<br>(>2000)                                   | 71.6<br>(5 years, 1 month)                               |
| MTC-10 | m<br>47                         | 1.1x0.9x1.1cm hypoechoic nodule with well-defined margins                                                             | 227                                              | 81.1                                             | 1.5            | Ca<br>(459)                                     | 108<br>(1 month)                                         |
| MTC-11 | f<br>47                         | MTC could not be clearly assigned to a nodule                                                                         | 31.9                                             | n.d.                                             | n.d.           | Pg<br>(1189)                                    | 28.0<br>(2 months)                                       |
| MTC-12 | f<br>78                         | 0.9x0.5x0.9cm hypoechoic nodule with well-defined margins<br>and microcalcifications                                  | 128                                              | 92                                               | 3              | Ca<br>(>2000)                                   | 126<br>(1.5 months)                                      |
| MTC-13 | m<br>77                         | MTC could not be clearly assigned to a nodule                                                                         | 49.4                                             | 41.2                                             | 4.1            | Ca<br>(1517)                                    | 48.4<br>(1 month)                                        |
| MTC-14 | m<br>72                         | 1.4x1.4x2.3cm hypoechoic nodule with well-defined margins,<br>small cystic structures, micro- and macrocalcifications | 291                                              | 266                                              | 7.9            | Ca<br>(>2000)                                   | 345<br>(1 month)                                         |
| MTC-15 | f<br>76                         | 2.1x2.6x1.3cm hypoechoic nodule with macrocalcifications and<br>cystic structures                                     | 1276                                             | 1312                                             | 42.2           | n.d.                                            | 1312<br>(0 months)                                       |
| MTC-16 | f<br>64                         | MTC could not be clearly assigned to a nodule                                                                         | 10.1                                             | n.d.                                             | n.d.           | Ca<br>(>2000)                                   | 25.1<br>(3 years 9 months)                               |
